# Supplementary material for: Functional Conservation of Gsdma Cluster Genes Specifically Duplicated in the Mouse Genome
Source: PubMed Central journal article supplement (PMC3789809; doi:10.1534/g3.113.007393), 2013-10-01
Supplement: supp_g3.113.007393_007393SI.pdf [file supp_g3.113.007393_007393SI.pdf]

## Functional conservation of *Gsdma* cluster genes specifically duplicated in the mouse genome

Shigekazu Tanaka<sup>\*,1</sup>, Youichi Mizushina<sup>\*</sup>, Yoriko Kato<sup>\*</sup>, Masaru Tamura<sup>\*</sup> and Toshihiko Shiroishi<sup>\*</sup>

<sup>\*</sup>Mammalian Genetics Laboratory, Genetic Strains Research Center, National Institute of Genetics. 1111 Yata, Mishima, Shizuoka 411-8450, Japan

<sup>1</sup> Present address: Juntendo Casualty Center, 1129 Nagaoka, Izunokuni, Shizuoka 410-2211, Japan

DOI: [10.1534/g3.113.007393](https://doi.org/10.1534/g3.113.007393)

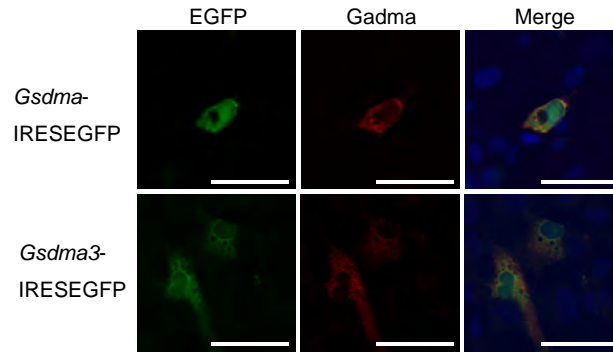

**Figure S1** Characterization of polyclonal Gsdm antibody. Immunostaining of *Gsdma*-IRES-EGFP or *Gsdma3*-IRES-EGFP expressing Cos7 cells. The cells were fixed with 10% formaldehyde, permeabilized with 0.5% Triton-X 100, and immunostained with antibody against *Gsdma*. Nuclei were stained with ToPro3. This antibody cross-reacts with *Gsdma3* protein. Scale bars are 50  $\mu$ m.

### Expression levels at P5 epidermis

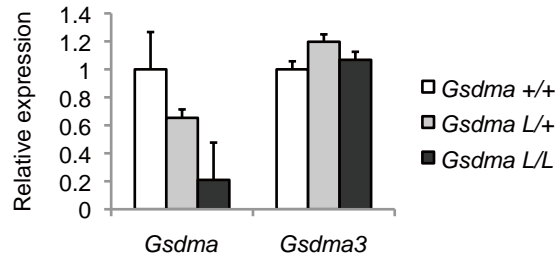

**Figure S2** Relative expression levels of *Gsdma* and *Gsdma3* genes in *Gsdma*<sup>LacZ/LacZ</sup> skin. Real-time quantitative PCR was performed with TaqMan universal PCR Master Mix reagent using an ABI Prism 7700 (Applied Biosystems, Tokyo, Japan). cDNA was synthesized from 1 µg of DNase-treated total RNA from skin of wild-type (+/+), heterozygous (L/+) and homozygous (L/L) mice using SuperScript<sup>TM</sup> III (Invitrogen Japan, Tokyo, Japan). Actb was used for normalization. Real-time quantitative PCR analysis confirmed the unchanged relative expression levels of the *Gsdma3* gene between wild-type and *Gsdma*<sup>LacZ/LacZ</sup> mice at P5.

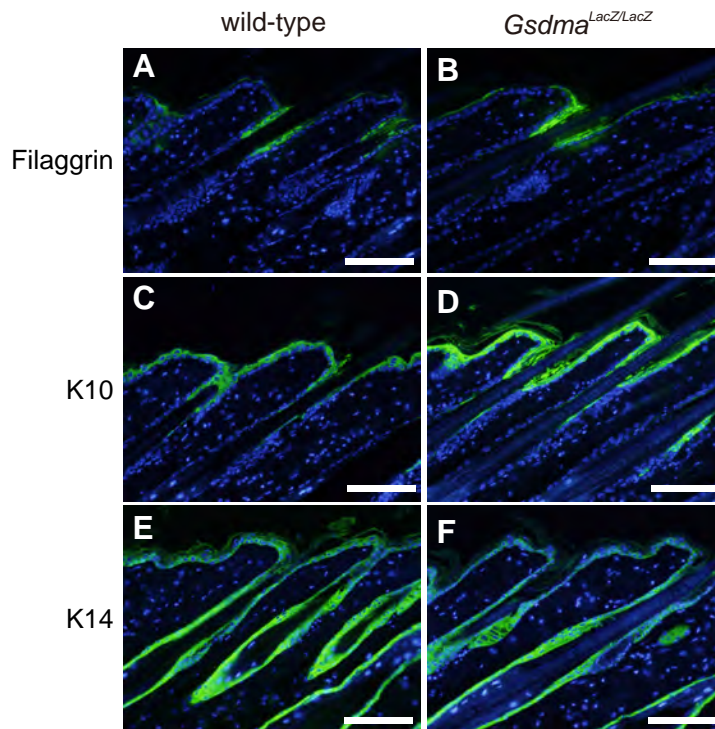

**Figure S3** The expression of epidermal differentiation markers. Skin sections of wild-type (**A**, **C** and **E**) and *Gsdma*<sup>LacZ/LacZ</sup> mice (**B**, **D** and **F**) at 1 month of age. Filaggrin (1:100, Covance, Richmond, CA, USA) was used as a marker for the cornified cell layer (**A** and **B**). K10 (1:50, Covance) was used as a marker for the granular cell layer (**C** and **D**). K14 was used as a marker for the basal cell layer (**E** and **F**). Nuclear staining was performed by DAPI (Invitrogen Japan). Scale bars are 100  $\mu$ m.

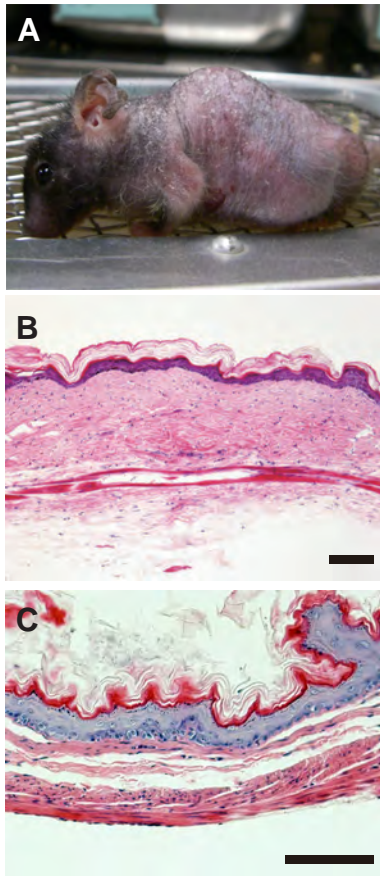

**Figure S4.** Phenotypes of a mouse with K5-*Gsdma* (A339T) transgene at 1 year of age. Macroscopic phenotype of a K5-*Gsdma* (A339T) transgenic mouse at 1 year of age (**A**). HE stained sections of skin (**B**) and cardia (**C**) of a K5-*Gsdma* (A339T) transgenic mouse at 1 year of age. Scale bars are 100  $\mu$ m.
