# Supplementary material for: Functional Conservation of Gsdma Cluster Genes Specifically Duplicated in the Mouse Genome
Source: PubMed Central journal article supplement (PMC3789809; doi:10.1534/g3.113.007393), 2013-10-01
Supplement: supp_g3.113.007393_FigureS1.pdf [file supp_g3.113.007393_FigureS1.pdf]

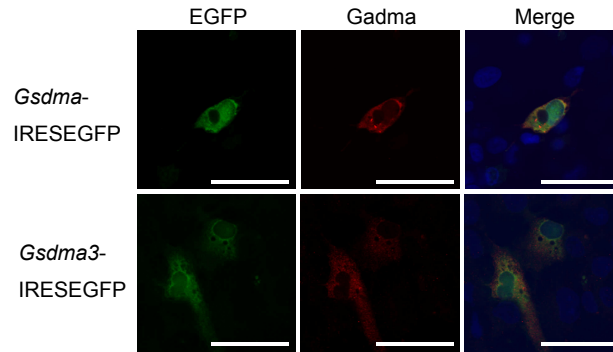

**Figure S1** Characterization of polyclonal Gsdm antibody. Immunostaining of *Gsdma*-IRES-EGFP or *Gsdma3*-IRES-EGFP expressing Cos7 cells. The cells were fixed with 10% formaldehyde, permeabilized with 0.5% Triton-X 100, and immunostained with antibody against *Gsdma*. Nuclei were stained with ToPro3. This antibody cross-reacts with *Gsdma3* protein. Scale bars are 50  $\mu$ m.
