# Supplementary material for: Functional Conservation of Gsdma Cluster Genes Specifically Duplicated in the Mouse Genome
Source: PubMed Central journal article supplement (PMC3789809; doi:10.1534/g3.113.007393), 2013-10-01
Supplement: supp_g3.113.007393_FigureS3.pdf [file supp_g3.113.007393_FigureS3.pdf]

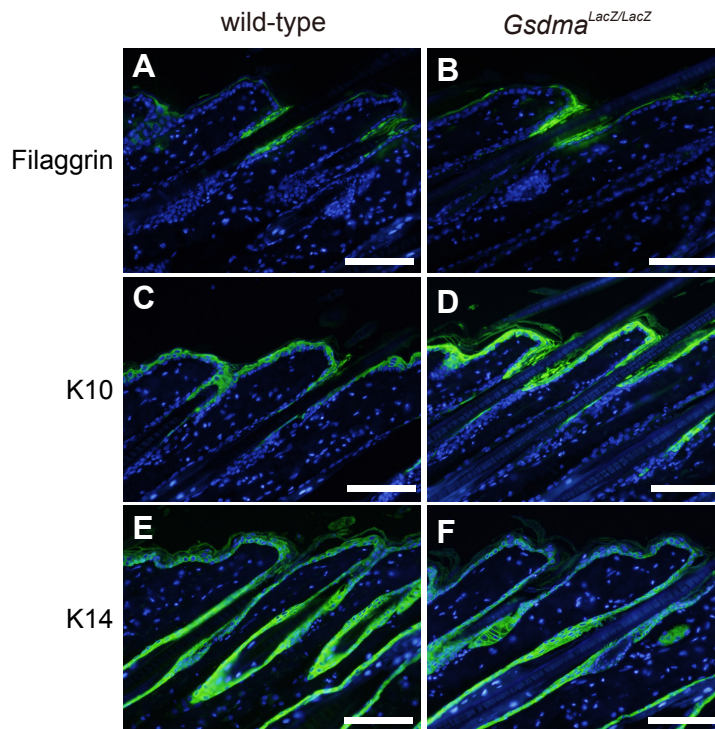

**Figure S3** The expression of epidermal differentiation markers. Skin sections of wild-type (**A**, **C** and **E**) and *Gsdma*<sup>LacZ/LacZ</sup> mice (**B**, **D** and **F**) at 1 month of age. Filaggrin (1:100, Covance, Richmond, CA, USA) was used as a marker for the cornified cell layer (**A** and **B**). K10 (1:50, Covance) was used as a marker for the granular cell layer (**C** and **D**). K14 was used as a marker for the basal cell layer (**E** and **F**). Nuclear staining was performed by DAPI (Invitrogen Japan). Scale bars are 100  $\mu$ m.
